# Supplementary material for: Mapping the medical outcomes study HIV health survey (MOS-HIV) to the EuroQoL 5 Dimension (EQ-5D-3 L) utility index
Source: Health Qual Life Outcomes. 2019 May 10;17:83. doi: 10.1186/s12955-019-1135-8 (PMC6511158; doi:10.1186/s12955-019-1135-8)
Supplement: Supplementary file 1 — MOS-HIV to EQ-5D-3L mapping functions. (XLS 27 kb) [file 12955_2019_1135_MOESM1_ESM.xls]

## Sheet: Sheet1
MOS-score	MRM	EPM
18	-0.239	-0.32225
19	-0.166	-0.293
20	-0.1505	-0.25025
21	-0.135	-0.20525
22	-0.092	-0.1625
23	-0.074	-0.12275
24	-0.053	-0.08375
25	-0.012	-0.0455
26	0.027	-0.0095
27	0.07	0.02875
28	0.151	0.0685
29	0.187	0.11125
30	0.199	0.15325
31	0.246	0.19975
32	0.281	0.24775
33	0.293	0.298
34	0.441	0.35275
35	0.516	0.412
36	0.575	0.4675
37	0.62	0.514
38	0.62	0.5485
39	0.645	0.57625
40	0.678	0.601
41	0.689	0.62275
42	0.689	0.643
43	0.711	0.6625
44	0.725	0.68125
45	0.726	0.69925
46	0.733	0.715
47	0.776	0.73075
48	0.796	0.745
49	0.796	0.75925
50	0.796	0.772
51	0.826	0.78625
52	0.848	0.802
53	0.848	0.8185
54	0.918	0.83725
55	1	0.856
56	1	0.87625
57	1	0.89575
58	1	0.91525
59	1	0.93325
60	1	0.94975
61	1	0.9625
62	1	0.97375
63	1	0.98275
64	1	0.98875
65	1	0.99175
